# Supplementary material
Source: PubMed Central journal article supplement (PMC6697228)
Supplement: NIHMS1018426-supplement-supp_info.pdf [file NIHMS1018426-supplement-supp_info.pdf]

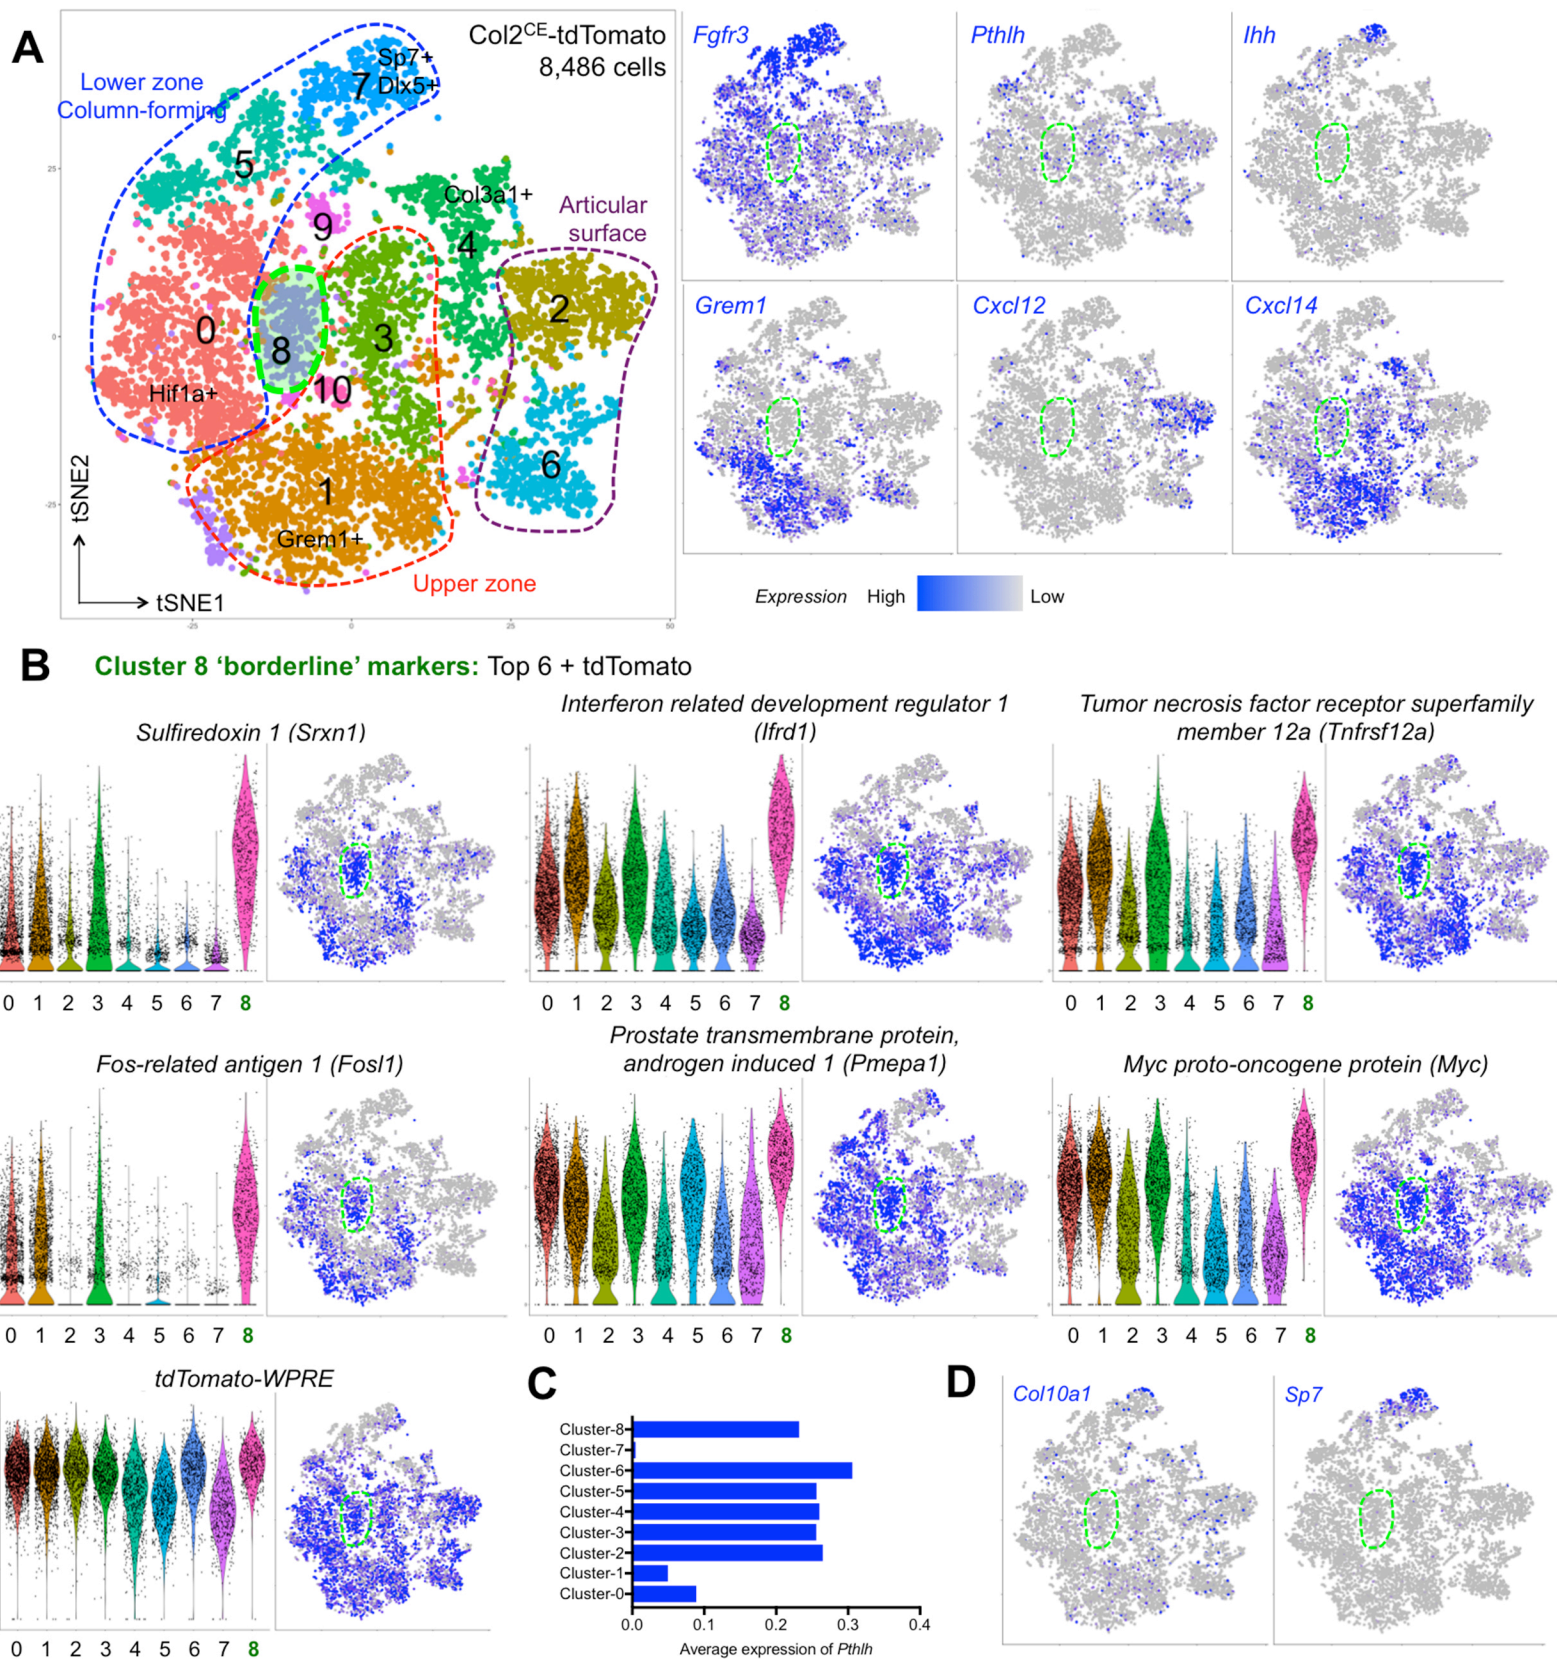

**Supplemental Figure 1. Single cell RNA-seq characterization of neonatal growth plate chondrocytes.**

(A) *t*-SNE-based visualization of major classes of FACS-sorted *Col2a1-creER*<sup>+</sup> neonatal growth plate chondrocytes at P2 (Cluster 0-10). Cluster 0,5,7: lower zone column-forming chondrocytes, Cluster 1,3: upper zone chondrocytes, Cluster 2,6: articular surface chondrocytes, Cluster 4: collagen-rich articular cells, Cluster 8: borderline chondrocytes, Cluster 9,10: cells in cell cycle. Feature plots: expression of the indicated gene. Blue: high expression, grey: no expression. *n*=8,486 cells. (B) Violin plots and feature plots for top 6 'borderline' markers most significantly enriched in Cluster 8 (*Srxn1*, *Ifrd1*, *Tnfrsf12a*, *Fosl1*, *Pmepa1*, *Myc*) and *tdTomato-WPRE*. Dots: individual cells, *y*-axis: expression level. (C) Average expression of *Pthlh* in each cluster. (D) Feature plots of hypertrophic markers. Green contour: Cluster 8.

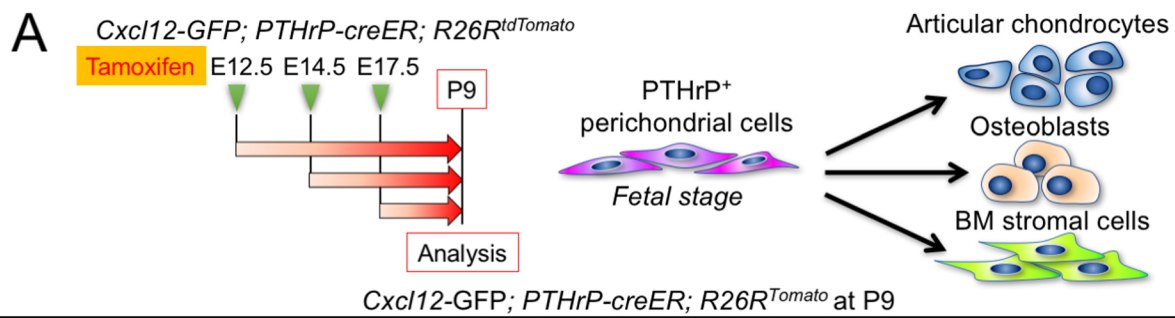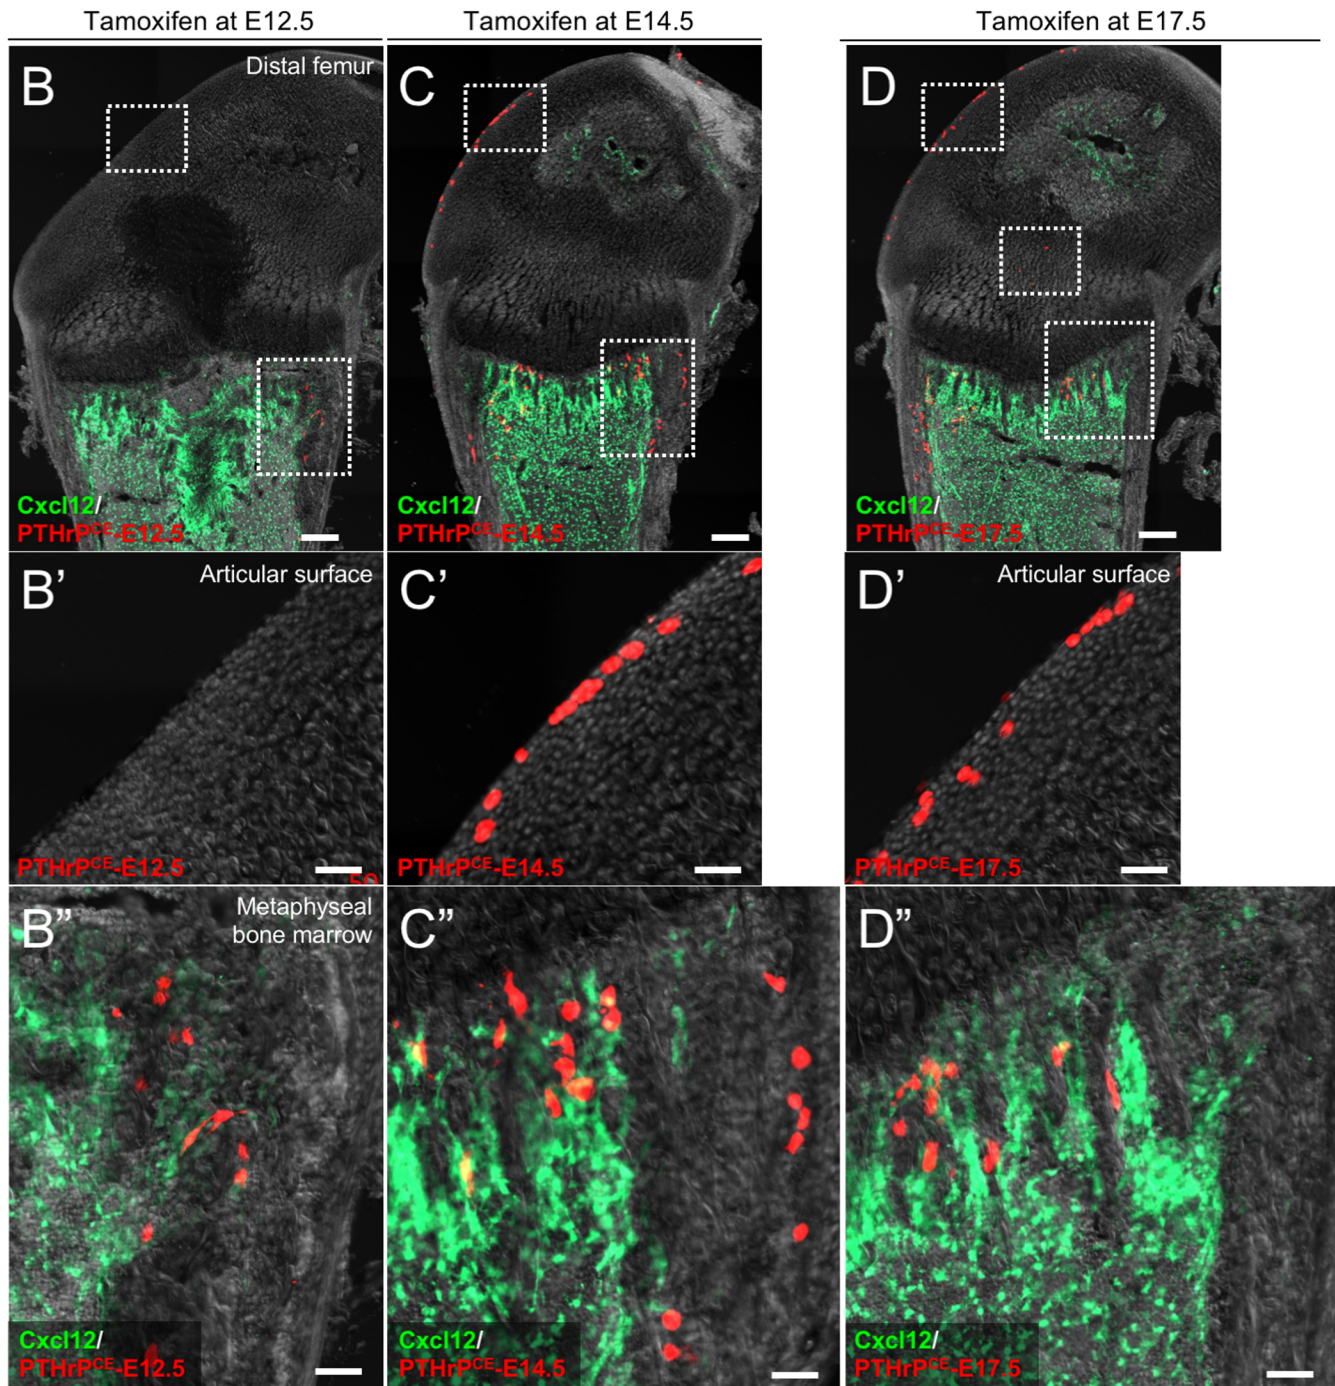

**Supplemental Figure 2. Fate of fetal *Pthrp-creER*<sup>+</sup> perichondrial cells.**

Cell fate analysis of fetal *Pthrp-creER*<sup>+</sup> perichondrial cells. (A): Diagram of the pulse-chase experiment. Distal femurs were analyzed at P9 after being pulsed at preceding time points (E12.5, E14.5 and E17.5). (B-D) *Cxcl12-GFP; Pthrp-creER; R26R<sup>Tomato</sup>* distal femurs. (B'-D'): magnified views of articular surface, (B''-D''): magnified views of peripheral metaphyseal marrow space. Green: *Cxcl12-GFP* (A-D), red: tdTomato, Grey: DAPI and DIC. Scale bars: 200µm (B-D), 50µm (B'-D', B''-D'').

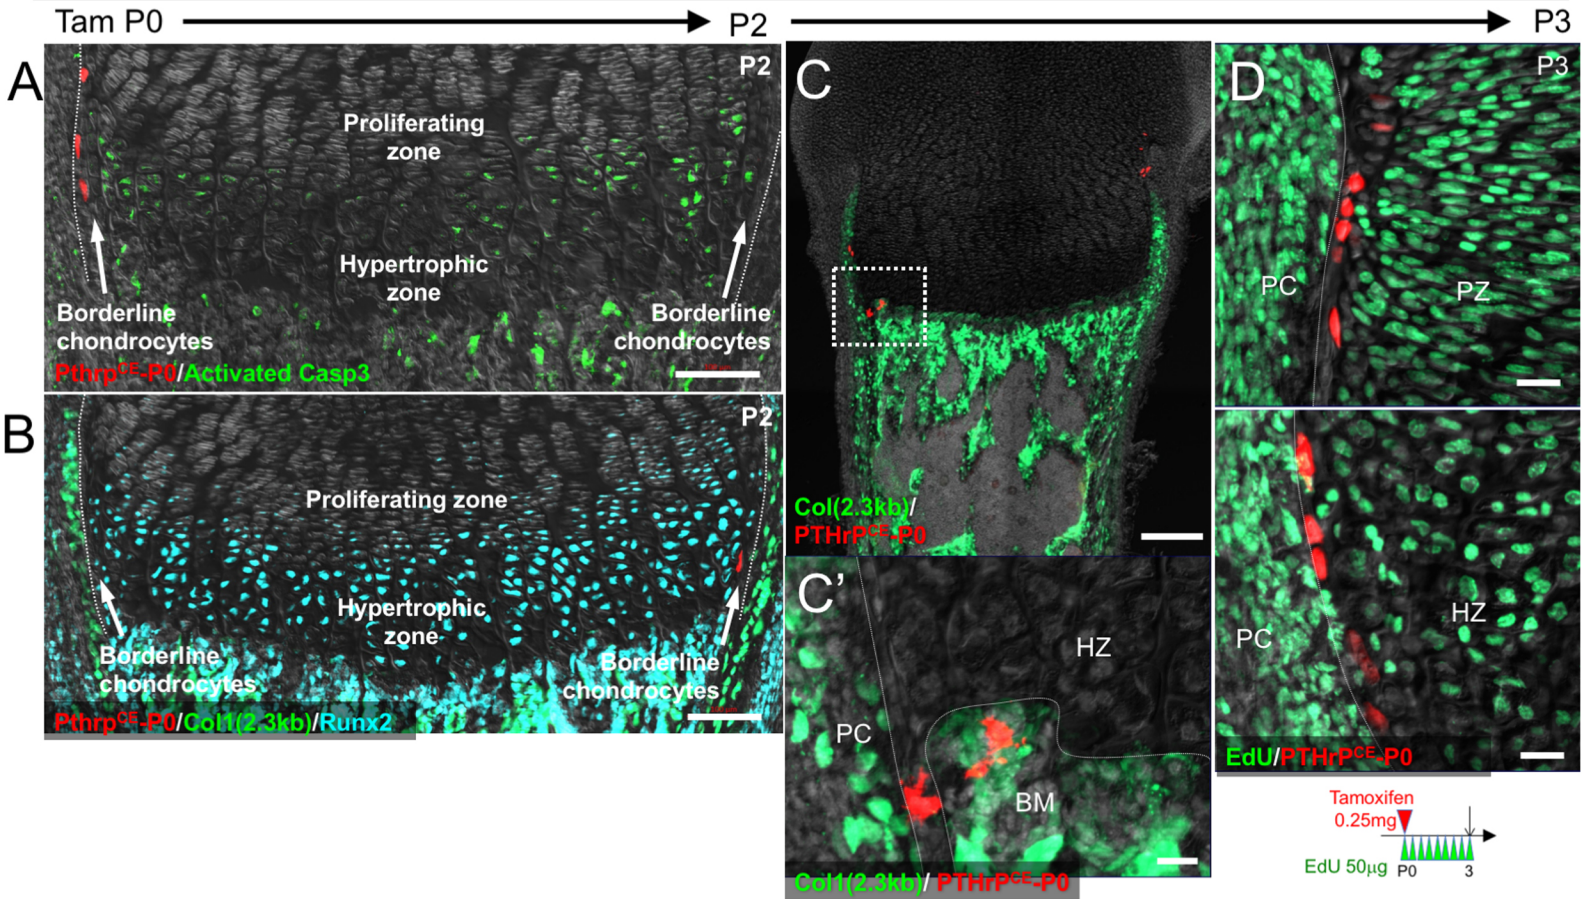

### Supplemental Figure 3. Characterization of *Pthrp-creER*<sup>+</sup> borderline chondrocytes.

(A-C): *Pthrp-creER*; *R26R<sup>tdTomato</sup>* (A), *Col1a1(2.3kb)-GFP*; *Pthrp-creER*; *R26R<sup>tdTomato</sup>* (B,C) distal femurs staining for activated Caspase 3 (A) and Runx2 (B). Scale bars: 100µm.

(C,D): Short-chase analysis of *Pthrp-creER*<sup>+</sup> borderline chondrocytes (P0-pulsed) at P3. (C'): magnified views of the dotted areas. (D): EdU (50µg) was serially injected 9 times at an 8-hour interval between P0 and P3. PC: perichondrium, PZ: proliferating zone, HZ: hypertrophic zone, BM: bone marrow. Scale bars: 200µm (C), 20µm (C',D).

*Cxcl12*-GFP; *PTHrP*-creER; *R26R*<sup>Tomato</sup>

*Col1a1*(2.3kb);  
*PTHrP*-creER; *R26R*<sup>Tomato</sup>

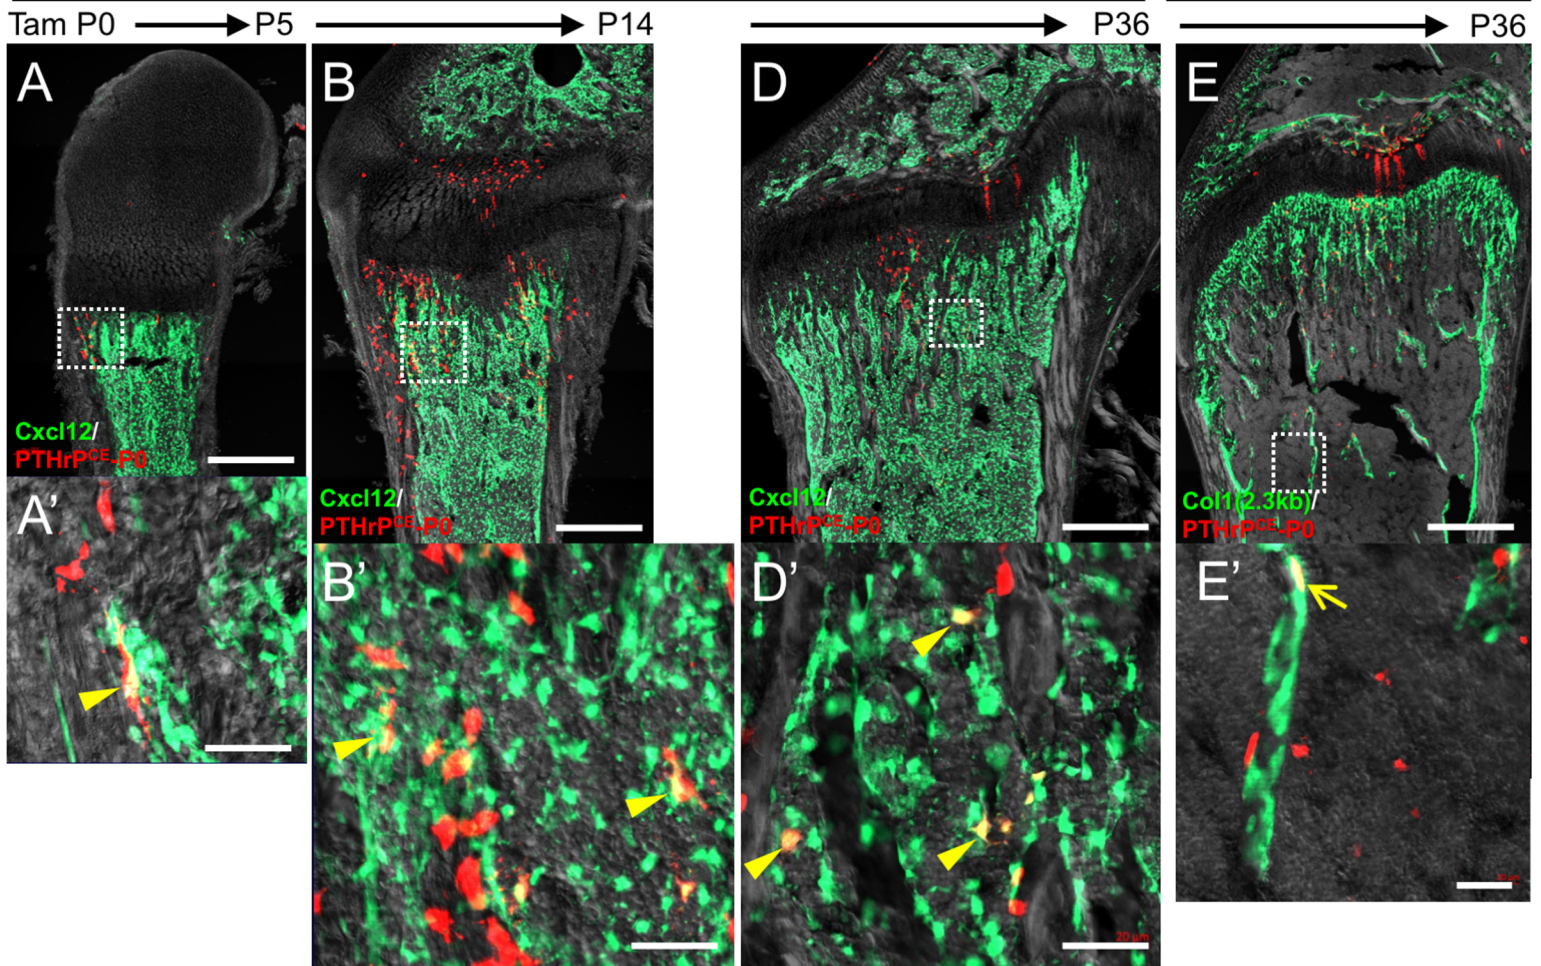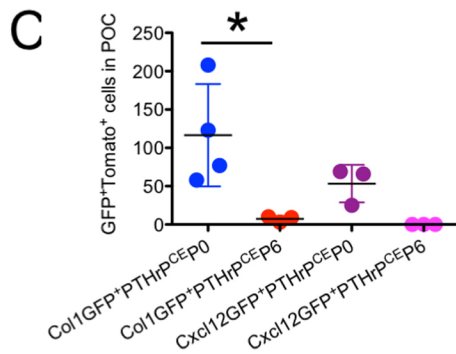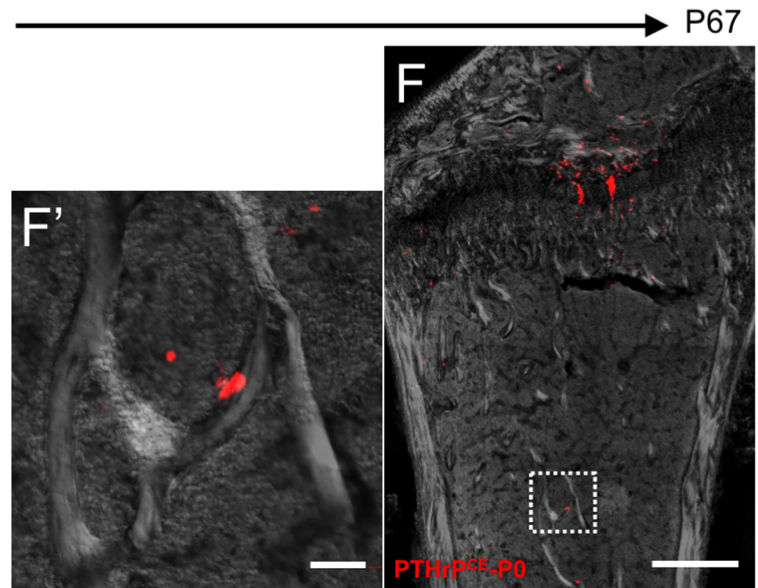

**Supplemental Figure 4. *Pthrp*-creER<sup>+</sup> borderline chondrocytes behave as precursors for CXCL12<sup>+</sup> bone marrow stromal cells.**

Cell fate analysis of *Pthrp*-creER<sup>+</sup> borderline chondrocytes (P0-pulsed) at P5 (A), P14 (B,C), P36 (D,E) and P67 (F). (A,B,D): *Cxcl12*-GFP; *Pthrp*-creER; *R26R*<sup>tdTomato</sup> distal femurs, (C): Quantification of *Col1a1*(2.3kb)-GFP<sup>+</sup>tdTomato<sup>+</sup> cells and *Cxcl12*-GFP<sup>+</sup>tdTomato<sup>+</sup> cells at P14, after being pulsed at P0 or P6. \**p*<0.05, One-way ANOVA followed by Tukey's multiple comparison test. (E): *Col1a1*(2.3kb)-GFP; *Pthrp*-creER; *R26R*<sup>tdTomato</sup> distal femur, (F): *Pthrp*-creER; *R26R*<sup>tdTomato</sup> distal femur. (A'-F'): magnified views of the dotted areas. Arrowheads: *Cxcl12*-GFP<sup>+</sup>tdTomato<sup>+</sup> cells in marrow space, arrow: *Col1a1*(2.3kb)-GFP<sup>+</sup>tdTomato<sup>+</sup> Green: *Cxcl12*-GFP, red: tdTomato, Grey: DAPI and DIC. Scale bars: 500µm, 50µm.
